# Supplementary material for: Efficacy and safety of PD-1/PD-L1 plus CTLA-4 antibodies ± other therapies in lung cancer: a systematic review and meta-analysis
Source: HighWire-hosted journal article supplement (doi:10.1136/ejhpharm-2021-002803), 2021-09-08

Supplemental figure 1 Preferred reporting items for systematic reviews and meta-analyses flow diagram of study selection process.

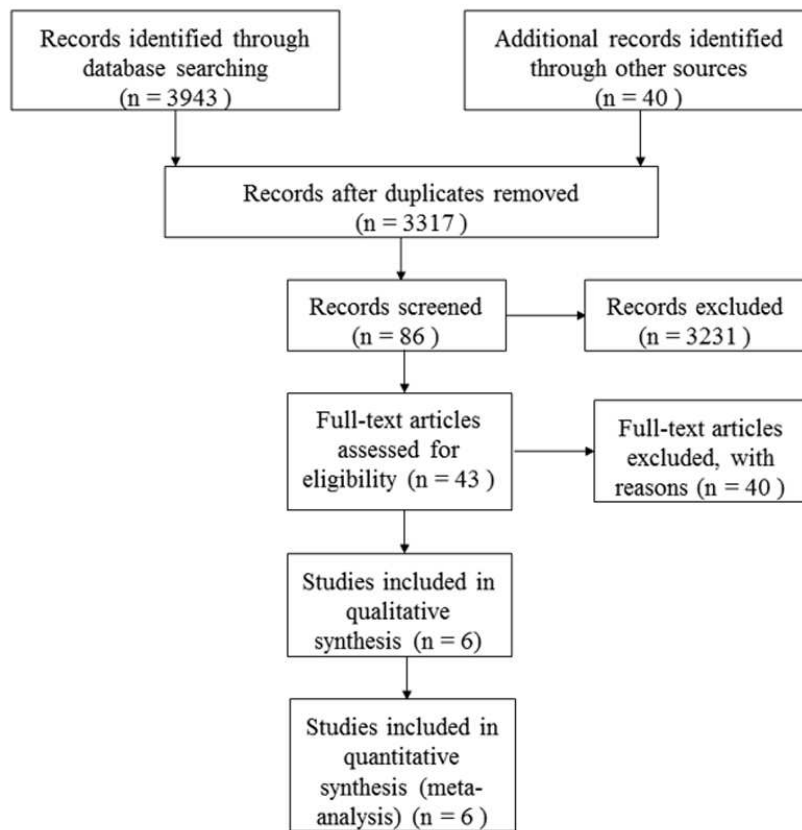

Supplement: ejhpharm-2021-002803supp001_data_supplement.pdf [file ejhpharm-2021-002803supp001_data_supplement.pdf]
